# Supplementary material for: Genetic variants in regulatory regions of microRNAs are associated with lung cancer risk
Source: PubMed Central journal article supplement (PMC5216992; doi:10.18632/oncotarget.10299), 2016-06-25
Supplement: oncotarget-07-47966-s001.pdf [file oncotarget-07-47966-s001.pdf]

## Genetic variants in regulatory regions of microRNAs are associated with lung cancer risk

### Supplementary Materials

**Supplementary Table S1: Characteristics of subjects**

| Variable                | Cases ( <i>N</i> = 1,341) | Controls ( <i>N</i> = 1,982) | <i>P</i> |
|-------------------------|---------------------------|------------------------------|----------|
|                         | <i>N</i> (%)              | <i>N</i> (%)                 |          |
| Age                     |                           |                              |          |
| < 60                    | 589 (43.9)                | 873 (44.0)                   | 0.972    |
| ≥ 60                    | 752 (56.1)                | 1109 (56.0)                  |          |
| Gender                  |                           |                              |          |
| Male                    | 949 (70.8)                | 1358 (68.5)                  | 0.179    |
| Female                  | 392 (29.2)                | 624 (31.5)                   |          |
| Smoking                 |                           |                              |          |
| Never                   | 522 (38.9)                | 1020 (51.5)                  | < 0.001  |
| Ever                    | 819 (61.1)                | 962 (48.5)                   |          |
| Histological types      |                           |                              |          |
| Squamous cell carcinoma | 481 (35.9%)               |                              |          |
| Adenocarcinoma          | 860 (64.1%)               |                              |          |

**Supplementary Table S2: Patients' characteristics and clinical features in the survival analysis**

| Variables                                 | Patients        | Deaths         | MST<br>(Months) | Log-rank <i>P</i> | HR (95% CI)      |
|-------------------------------------------|-----------------|----------------|-----------------|-------------------|------------------|
|                                           | <i>N</i> = 1001 | <i>N</i> = 545 |                 |                   |                  |
| Age                                       |                 |                |                 | 0.903             |                  |
| < 60                                      | 428 (42.8)      | 229            | 25.8            |                   | 1.00             |
| ≥ 60                                      | 573 (57.2)      | 316            | 27.0            |                   | 0.99 (0.83–1.17) |
| Gender                                    |                 |                |                 | 0.034             |                  |
| Male                                      | 695 (69.4)      | 399            | 25.0            |                   | 1.00             |
| Female                                    | 306 (30.6)      | 146            | 32.9            |                   | 0.81 (0.67–0.99) |
| Smoking                                   |                 |                |                 | 0.027             |                  |
| Never                                     | 401 (40.1)      | 197            | 30.0            |                   | 1.00             |
| Ever                                      | 600 (59.9)      | 348            | 23.9            |                   | 1.22 (1.02–1.45) |
| Surgical operation                        |                 |                |                 | < 0.001           |                  |
| No                                        | 325 (32.5)      | 247            | 14.6            |                   | 1.00             |
| Yes                                       | 676 (67.5)      | 298            | 44.4            |                   | 0.33 (0.27–0.39) |
| Clinical stage <sup>a</sup>               |                 |                |                 | < 0.001           |                  |
| I/II                                      | 417 (41.7)      | 165            | 59.3            |                   | 1.00             |
| III/IV                                    | 564 (56.3)      | 370            | 18.9            |                   | 2.71 (2.25–3.27) |
| Histological types                        |                 |                |                 | 0.060             |                  |
| Squamous cell carcinoma                   | 344 (34.4)      | 198            | 22.2            |                   | 1.00             |
| Adenocarcinoma                            | 657 (65.6)      | 347            | 28.5            |                   | 0.85 (0.71–1.01) |
| Chemotherapy or radiotherapy <sup>b</sup> |                 |                |                 | 0.026             |                  |
| No                                        | 236 (23.6)      | 110            | 30.8            |                   | 1.00             |
| Yes                                       | 757 (75.6)      | 430            | 25.6            |                   | 1.27 (1.03–1.56) |

<sup>a</sup>Clinical stage information was available in 981 NSCLC patients.

<sup>b</sup>Chemotherapy or radiotherapy information was available in 993 NSCLC patients.

**Supplementary Table S3: Genotyping results of 7 SNPs and NSCLC survival**

| Gene              | SNP        | Allele <sup>a</sup> | Patients <sup>b</sup> | Deaths <sup>b</sup> | MST <sup>b</sup><br>(Months) | Log-rank <i>P</i> |                   |                                  |       |
|-------------------|------------|---------------------|-----------------------|---------------------|------------------------------|-------------------|-------------------|----------------------------------|-------|
|                   |            |                     |                       |                     |                              | Additive<br>model | Dominant<br>model | Codominant<br>model <sup>c</sup> |       |
|                   |            |                     |                       |                     |                              |                   |                   | het                              | hom   |
| miR-143/145       | rs3733846  | A/G                 | 457/428/115           | 257/223/65          | 25.6/29.4/21.6               | 0.353             | 0.436             | 0.256                            | 0.585 |
| miR-183/96/182    | rs12538588 | G/A                 | 910/91/0              | 493/52/0            | 26.0/27.0/0.0                | 0.693             | 0.693             | 0.693                            | —     |
| miR-21            | rs1292060  | A/G                 | 348/463/190           | 192/248/105         | 25.8/27.4/25.6               | 0.699             | 0.934             | 0.699                            | 0.579 |
| miR-30a           | rs763354   | G/A                 | 370/476/152           | 197/255/91          | 28.1/26.0/25.8               | 0.468             | 0.425             | 0.657                            | 0.204 |
| miR-200b/200a/429 | rs9660710  | C/A                 | 310/504/187           | 165/266/114         | 27.4/28.5/22.3               | 0.169             | 0.571             | 0.975                            | 0.101 |
| miR-210           | rs12286521 | A/G                 | 550/395/56            | 301/216/28          | 26.0/25.8/27.2               | 0.913             | 0.812             | 0.891                            | 0.672 |
| miR-451a          | rs901975   | G/A                 | 425/456/120           | 225/259/61          | 25.8/24.9/32.3               | 0.244             | 0.986             | 0.592                            | 0.187 |

<sup>a</sup>Major/minor allele.

<sup>b</sup>Major homozygote/heterozygote/minor homozygote.

<sup>c</sup>het: heterozygote versus major homozygote; hom: minor homozygote versus major homozygote.

**Supplementary Table S4: Associations of 7 SNPs with NSCLC prognosis**

| Genotype       | Patients | Deaths | MST      | Crude HR         | Adjusted HR           | <i>P</i> <sup>a</sup> |
|----------------|----------|--------|----------|------------------|-----------------------|-----------------------|
|                |          |        | (Months) | (95% CI)         | (95% CI) <sup>a</sup> |                       |
| rs3733846      |          |        |          |                  |                       |                       |
| AA             | 457      | 257    | 25.6     | 1.00             | 1.00                  | —                     |
| AG             | 428      | 223    | 29.4     | 0.90 (0.75–1.08) | 0.92 (0.76–1.10)      | 0.356                 |
| GG             | 115      | 65     | 21.6     | 1.07 (0.82–1.41) | 0.99 (0.75–1.31)      | 0.952                 |
| AG/GG          | 543      | 288    | 28.1     | 0.94 (0.79–1.11) | 0.94 (0.79–1.11)      | 0.420                 |
| Additive model | —        | —      | —        | 0.99 (0.87–1.12) | 0.97 (0.85–1.10)      | 0.639                 |
| rs12538588     |          |        |          |                  |                       |                       |
| GG             | 910      | 493    | 26.0     | 1.00             | 1.00                  | —                     |
| GA             | 91       | 52     | 27.0     | 1.06 (0.80–1.41) | 1.02 (0.76–1.36)      | 0.910                 |
| AA             | 0        | 0      | 0        | —                | —                     | —                     |
| GA/AA          | 91       | 52     | 27.0     | 1.06 (0.80–1.41) | 1.02 (0.76–1.36)      | 0.910                 |
| Additive model | —        | —      | —        | 1.06 (0.80–1.41) | 1.02 (0.76–1.36)      | 0.910                 |
| rs1292060      |          |        |          |                  |                       |                       |
| AA             | 384      | 192    | 25.8     | 1.00             | 1.00                  | —                     |
| AG             | 463      | 248    | 27.4     | 0.97 (0.80–1.17) | 1.00 (0.82–1.21)      | 0.993                 |
| GG             | 190      | 105    | 25.6     | 1.07 (0.84–1.35) | 0.96 (0.76–1.23)      | 0.765                 |
| AG/GG          | 653      | 353    | 26.5     | 0.99 (0.83–1.18) | 0.99 (0.83–1.18)      | 0.897                 |
| Additive model | —        | —      | —        | 1.02 (0.91–1.15) | 0.98 (0.87–1.11)      | 0.791                 |
| rs763354       |          |        |          |                  |                       |                       |
| GG             | 370      | 197    | 28.1     | 1.00             | 1.00                  | —                     |
| GA             | 476      | 255    | 26.0     | 1.17 (0.91–1.50) | 1.09 (0.90–1.32)      | 0.380                 |
| AA             | 152      | 91     | 25.8     | 1.04 (0.87–1.26) | 1.26 (0.98–1.62)      | 0.076                 |
| GA/AA          | 628      | 346    | 25.8     | 1.07 (0.90–1.28) | 1.13 (0.94–1.35)      | 0.186                 |
| Additive model | —        | —      | —        | 1.07 (0.95–1.21) | 1.12 (0.99–1.26)      | 0.083                 |
| rs9660710      |          |        |          |                  |                       |                       |
| CC             | 310      | 165    | 27.4     | 1.00             | 1.00                  | —                     |
| CA             | 504      | 266    | 28.5     | 1.00 (0.82–1.21) | 1.08 (0.89–1.32)      | 0.443                 |
| AA             | 187      | 114    | 22.3     | 1.22 (0.96–1.55) | 1.24 (0.97–1.58)      | 0.088                 |
| CA/AA          | 691      | 380    | 25.8     | 1.05 (0.88–1.27) | 1.12 (0.93–1.35)      | 0.223                 |
| Additive model | —        | —      | —        | 1.09 (0.97–1.23) | 1.11 (0.98–1.25)      | 0.095                 |
| rs12286521     |          |        |          |                  |                       |                       |
| AA             | 550      | 301    | 26.0     | 1.00             | 1.00                  | —                     |
| AG             | 395      | 216    | 25.8     | 0.99 (0.83–1.18) | 1.07 (0.89–1.28)      | 0.476                 |
| GG             | 56       | 28     | 27.2     | 0.92 (0.62–1.36) | 0.97 (0.66–1.43)      | 0.881                 |
| AG/GG          | 451      | 244    | 25.8     | 0.98 (0.83–1.16) | 1.05 (0.89–1.25)      | 0.544                 |
| Additive model | —        | —      | —        | 0.98 (0.85–1.12) | 1.03 (0.89–1.19)      | 0.697                 |
| rs901975       |          |        |          |                  |                       |                       |
| GG             | 425      | 225    | 25.8     | 1.00             | 1.00                  | —                     |
| GA             | 456      | 259    | 24.9     | 1.05 (0.88–1.26) | 1.01 (0.84–1.21)      | 0.924                 |
| AA             | 120      | 61     | 32.3     | 0.83 (0.62–1.10) | 0.91 (0.68–1.21)      | 0.498                 |
| GA/AA          | 576      | 320    | 26.5     | 1.00 (0.84–1.18) | 0.99 (0.83–1.18)      | 0.888                 |
| Additive model | —        | —      | —        | 0.95 (0.84–1.08) | 0.97 (0.85–1.10)      | 0.635                 |

MST, median survival time; HR, hazard ratio; CI, confidence interval.

<sup>a</sup>Adjusted for age, gender, smoking, clinical stage, chemotherapy or radiotherapy, surgery and histological types.

**Supplementary Table S5: Summary of genomic annotation by HaploReg for SNPs in high LD with rs9660710 ( $r^2 > 0.80$ )**

| Variant     | LD ( $r^2$ ) | Ref   | Alt   | ASN  | Promoter                   | Enhancer      | DNase                      | Proteins bound   | Motifs changed    | RefSeq              |
|-------------|--------------|-------|-------|------|----------------------------|---------------|----------------------------|------------------|-------------------|---------------------|
|             |              |       |       | freq | histone marks              | histone marks |                            |                  |                   | genes               |
| rs6604973   | 0.82         | G     | A     | 0.57 | ST.SMUS28, R.MUC29, R.SMUS | 10 cell types | —                          | —                | —                 | 7.1kb 5' of MIR200B |
| rs1539636   | 0.90         | T     | C     | 0.59 | COL. MUC32, R.MUC31        | 8 cell types  | Medullo, SK-N-SH, RA       | —                | 8 altered motifs  | 5.6kb 5' of MIR200B |
| rs1539634   | 0.90         | C     | T     | 0.59 | COL. MUC32, R.MUC31        | 9 cell types  | —                          | —                | SP1,SRF           | 5.4kb 5' of MIR200B |
| rs9442384   | 0.90         | T     | C     | 0.59 | 4 cell types               | 9 cell types  | Osteobl                    | —                | Sin3Ak-20         | 5.2kb 5' of MIR200B |
| rs9442385   | 0.90         | T     | G     | 0.59 | 4 cell types               | 9 cell types  | Osteobl                    | —                | 10 altered motifs | 5.1kb 5' of MIR200B |
| rs145121017 | 0.90         | CCCCA | C     | 0.59 | 5 cell types               | 15 cell types | Fibrobl                    | —                | 34 altered motifs | 5.1kb 5' of MIR200B |
| rs9660710   | 1.00         | A     | C     | 0.58 | 18 cell types              | 9 cell types  | LNCaP                      | —                | BRCA1, CHD2       | 3.1kb 5' of MIR200B |
| rs1891905   | 0.85         | C     | T     | 0.61 | 14 cell types              | 14 cell types | Fibrobl, Caco-2, H7-hESC   | 4 bound proteins | —                 | 2.3kb 5' of MIR200B |
| rs1891904   | 0.82         | C     | A     | 0.60 | 14 cell types              | 14 cell types | 16 cell types              | 5 bound proteins | CTCF,YY1          | 2.2kb 5' of MIR200B |
| rs7549819   | 0.80         | C     | T     | 0.60 | 13 cell types              | 19 cell types | 5 cell types               | USF2             | 4 altered motifs  | 1.5kb 5' of MIR200B |
| rs7518873   | 0.81         | T     | C     | 0.58 | PFF.2                      | 13 cell types | GM12891                    | —                | 6 altered motifs  | 209bp 3' of MIR200A |
| rs36015232  | 0.83         | C     | 9-mer | 0.59 | —                          | 14 cell types | LNCaP, Osteobl             | —                | —                 | 358bp 3' of MIR200A |
| rs7521584   | 0.86         | T     | A,G   | 0.59 | —                          | 15 cell types | HSMMtube, Chorion, GM19240 | —                | —                 | 425bp 5' of MIR429  |

The LD information was derived from the 1000 Genomes Project ASN (East Asian) data for the rs9660710 (marked in bold) and its surrogates. DNase, Proteins bound and Motifs changed demonstrated evidence of Dnase hypersensitivity sites or transcription factor occupancy as shown by the HaploReg v2 analysis.

**Supplementary Table S6: Summary of genomic annotation by HaploReg for SNPs with rs763354 in high LD ( $r^2 > 0.80$ )**

| Variant     | LD ( $r^2$ ) | Ref | Alt | ASN  | Promoter                 | Enhancer      | DNase                 | Proteins bound     | Motifs changed    | RefSeq               |
|-------------|--------------|-----|-----|------|--------------------------|---------------|-----------------------|--------------------|-------------------|----------------------|
|             |              |     |     | freq | histone marks            | histone marks |                       |                    |                   | genes                |
| rs9351810   | 0.95         | C   | T   | 0.39 | 4 cell types             | 30 cell types | 7 cell types          | CFOS, CJUN, GATA2  | Dbx1, Osr         | 9.8kb 3' of MIR30A   |
| rs9364165   | 0.96         | C   | T   | 0.39 | MSC.ADIPC, ST.SMUS28     | 29 cell types | —                     | 5 bound proteins   | 13 altered motifs | 9.1kb 3' of MIR30A   |
| rs9364166   | 0.96         | C   | T   | 0.38 | —                        | 24 cell types | —                     | —                  | HLF               | 6.6kb 3' of MIR30A   |
| rs4291065   | 0.86         | T   | C   | 0.41 | —                        | 8 cell types  | —                     | —                  | NRSF              | 6.2kb 3' of MIR30A   |
| rs9364167   | 0.96         | G   | A   | 0.38 | —                        | 6 cell types  | —                     | —                  | 5 altered motifs  | 5.6kb 3' of MIR30A   |
| rs9351811   | 0.99         | G   | A   | 0.38 | —                        | 4 cell types  | —                     | —                  | 4 altered motifs  | 4.4kb 3' of MIR30A   |
| rs1405848   | 0.90         | C   | T   | 0.41 | —                        | 6 cell types  | —                     | —                  | 5 altered motifs  | 3.9kb 3' of MIR30A   |
| rs2222722   | 0.89         | G   | A   | 0.41 | 9 cell types             | 39 cell types | HCFAa, HMVEC-dLy-Ad   | CEBPB              | Rhox11            | 387bp 5' of MIR30A   |
| rs763354    | 1.00         | C   | T   | 0.39 | —                        | 25 cell types | —                     | —                  | AIRE, Sox         | 2.3kb 5' of MIR30A   |
| rs9283841   | 0.90         | T   | C   | 0.41 | —                        | 20 cell types | —                     | —                  | NF-I              | 2.8kb 5' of MIR30A   |
| rs7349905   | 1.00         | G   | C   | 0.39 | —                        | 28 cell types | HRCEpiC, HRE, PANC-1  | —                  | AP-1, Mxi1, SREBP | 5.4kb 5' of MIR30A   |
| rs9342836   | 1.00         | T   | C   | 0.39 | ST.SMUS28, KID.FE, LIV.A | 13 cell types | HA-sp                 | —                  | 11 altered motifs | 2.7kb 3' of C6orf155 |
| rs6902769   | 0.91         | T   | C   | 0.41 | 7 cell types             | 20 cell types | —                     | —                  | 4 altered motifs  | 1.5kb 3' of C6orf155 |
| rs1852578   | 0.90         | T   | A,G | 0.41 | KID.FE, LIV.A, SK.MUS62  | 14 cell types | —                     | —                  | —                 | 705bp 3' of C6orf155 |
| rs1918478   | 1.00         | G   | T   | 0.39 | KID.FE, LIV.A, SK.MUS62  | 15 cell types | —                     | —                  | GATA, LUN-1       | 75bp 3' of C6orf155  |
| rs6455418   | 0.86         | A   | T   | 0.40 | —                        | 17 cell types | —                     | —                  | ZID               | C6orf155             |
| rs113733589 | 0.86         | G   | A   | 0.37 | 79 cell types            | CC.TPC        | H1-hESC, Chorion, iPS | CTCF, CFOS, HAE2F1 | 8 altered motifs  | C6orf155             |
| rs12214632  | 0.81         | T   | A   | 0.40 | —                        | —             | —                     | —                  | CDP, Mef2         | 2.6kb 5' of C6orf155 |
| rs12192535  | 0.81         | G   | C   | 0.40 | —                        | —             | —                     | —                  | 5 altered motifs  | 2.7kb 5' of C6orf155 |
| rs9364168   | 0.89         | A   | G   | 0.37 | —                        | —             | —                     | —                  | 25 altered motifs | 4kb 5' of C6orf155   |
| rs9346470   | 0.82         | T   | C   | 0.38 | —                        | —             | —                     | —                  | DMRT1, Dobox4     | 5.9kb 5' of C6orf155 |

The LD information was derived from the 1000 Genomes Project ASN (East Asian) data for the rs763354 (marked in bold) and its surrogates. DNase, Proteins bound and Motifs changed demonstrated evidence of Dnase hypersensitivity sites or transcription factor occupancy as shown by the HaploReg v2 analysis.
